# Supplementary material
Source: PubMed Central journal article supplement (PMC5970062)

**dKO + HFD**

**Spleen**

**Aortic Arch**

**dKO + HFD + IL-19**

**Spleen**

**Aortic Arch**

**Treatment with IL-19**

**“Rescues”  
Atherogenesis**

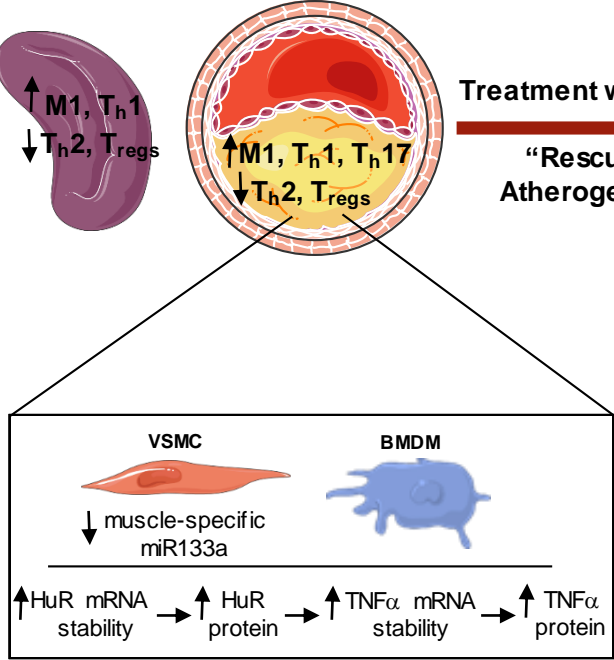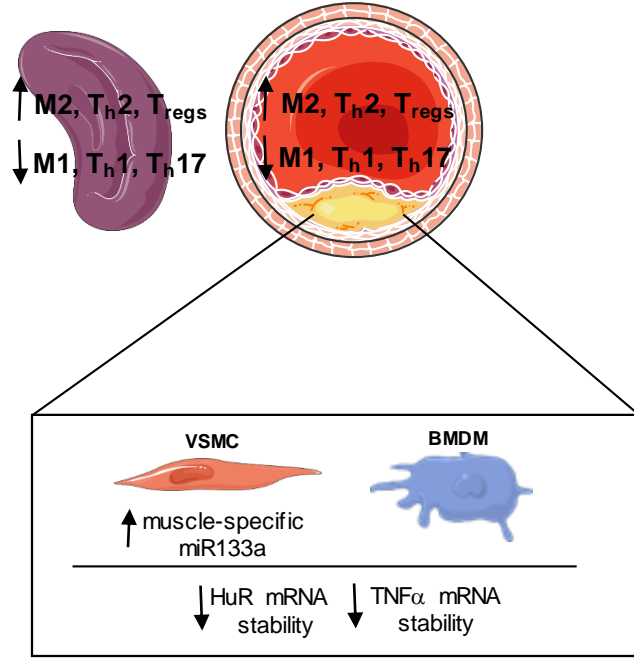

Supplement: NIHMS958562-supplement-Graphical_abstract.pdf [file NIHMS958562-supplement-Graphical_abstract.pdf]
